# Supplementary material for: New luminescent and redox-active homometallic dinuclear iridium(III), ruthenium(II) and osmium(II) complexes prepared by metal-catalyzed coupling reactions
Source: Royal Society of Chemistry journal article supplement (doi:10.1039/b006456o), 2000-01-01
Supplement: b006456o.doc [file b006456o.doc]

**Chemical Communications (paper no. B0064560)**

Title: **New luminescent and redox-active homometallic dinuclear Ir(III), Ru(II) and Os(II) complexes prepared by metal-catalyzed coupling reactions**

Authors: P.M. Griffiths, F. Loiseau, F. Puntoriero, S. Serroni and S. Campagna.

**Supplementary Information**

**Characterization**

**Complex 1.** Anal. calcd for C68H46N8Ir2P2F12 (found): C 49.51 (49.26), H 2.81 (2.73), N 6.79 (6.62). ESI-MS: m/z 1505.28 [(ppy)2Ir(phen-phen)Ir(ppy)2(PF6)]+, 680.16 [(ppy)2Ir(phen-phen)Ir(ppy)2]2+.

**Complex 2.** Anal. calcd for C64H46N12Ru2P4F24 (found): C 43.55 (43.18), H 2.63 (2.59), N 9.52 (9.39). ESI-MS: m/z 1621.10 [(bpy)2Ru(phen-phen)Ru(bpy)2(PF6)3]+, 738.07 [(bpy)2Ru(phen-phen)Ru(bpy)2(PF6)2]2+, 443.72 [(bpy)2Ru(phen-phen)Ru(bpy)2(PF6)]3+, 296.55 [(bpy)2Ru(phen-phen)Ru(bpy)2]4+.

**Complex 3.** Anal. calcd for C64H46N12Os2P4F24 (found): C 39.55 (39.11), H 2.39 (2.33), N 8.65 (8.57). ESI-MS: m/z 1801.21 [(bpy)2Os(phen-phen)Os(bpy)2(PF6)3]+, 828.12 [(bpy)2Os(phen-phen)Os(bpy)2(PF6)2]2+, 503.76 [(bpy)2Os(phen-phen)Os(bpy)2(PF6)]3+, 341.58 [(bpy)2Os(phen-phen)Os(bpy)2]4+.

**Complex 4.** Anal. calcd for C72H62N12Os2P4F24 (found): C 42.07 (41.95), H 3.04 (3.00), N 8.18 (8.02). 1H NMR (300 MHz, CD3CN):  = 8.33 (m, ArH, 2 H), 8.11 (m, ArH, 12 H), 7.85 (m, ArH, 4 H), 7.42 (m, ArH, 8 H), 7.00 (m, ArH, 8 H), 6.74 (m, ArH, 4 H), 2.43 (br s, ArCH3, 12 H), 2.32 (br s, ArCH3, 12 H). ESI-MS: m/z 1913.34 [(Me2bpy)2Os(phen-phen)Os(Me2bpy)2(PF6)3]+, 884.18 [(Me2bpy)2Os(phen-phen)Os(Me2bpy)2(PF6)2]2+, 541.14 [(Me2bpy)2Os(phen-phen)Os(Me2bpy)2(PF6)]3+, 369.61 [(Me2bpy)2Os(phen-phen)Os(Me2bpy)2]4+.

**
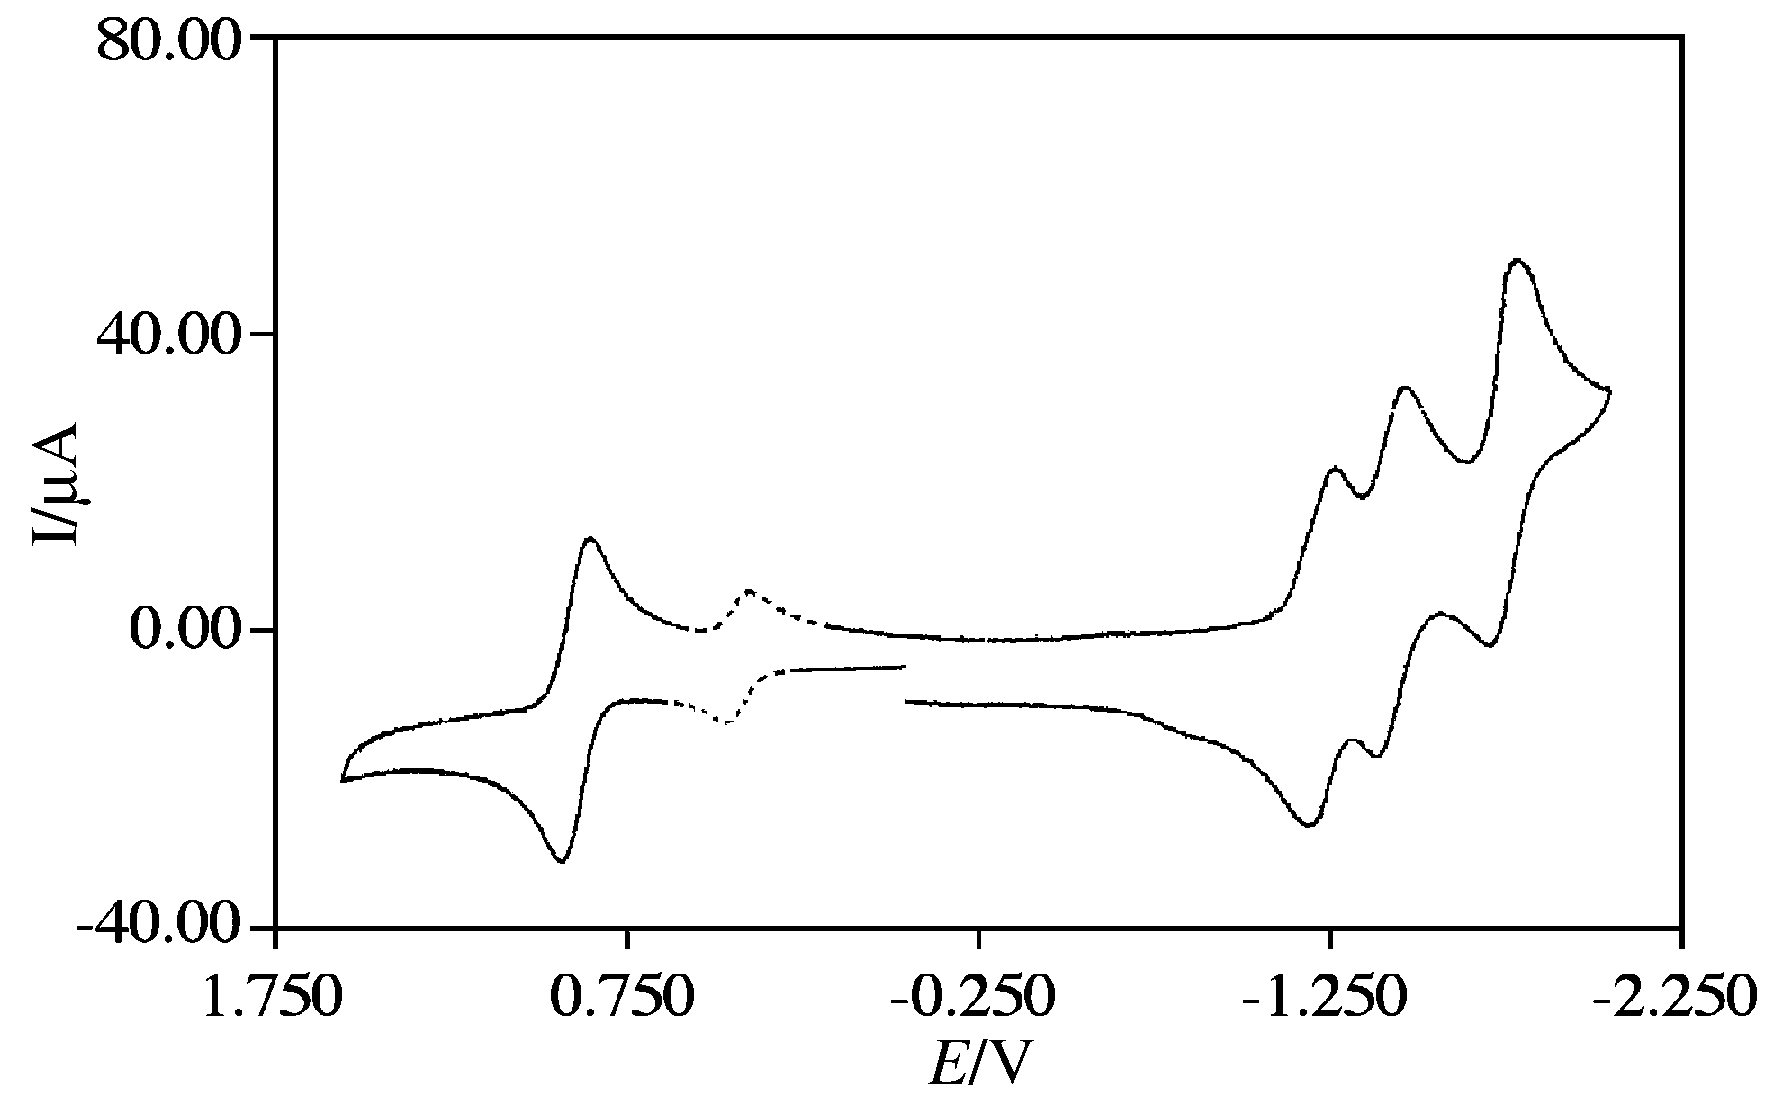
**

**Figure 1.** Cyclic voltammetry curve of **3** in argon-purged acetonitrile solution at room temperature. Scan rate: 200 mV/s; working electrode: glassy carbon; counter electrode: Pt wire; reference electrode: SCE. The oxidation wave of ferrocene, used as internal standard, is highlighted by dashed line.


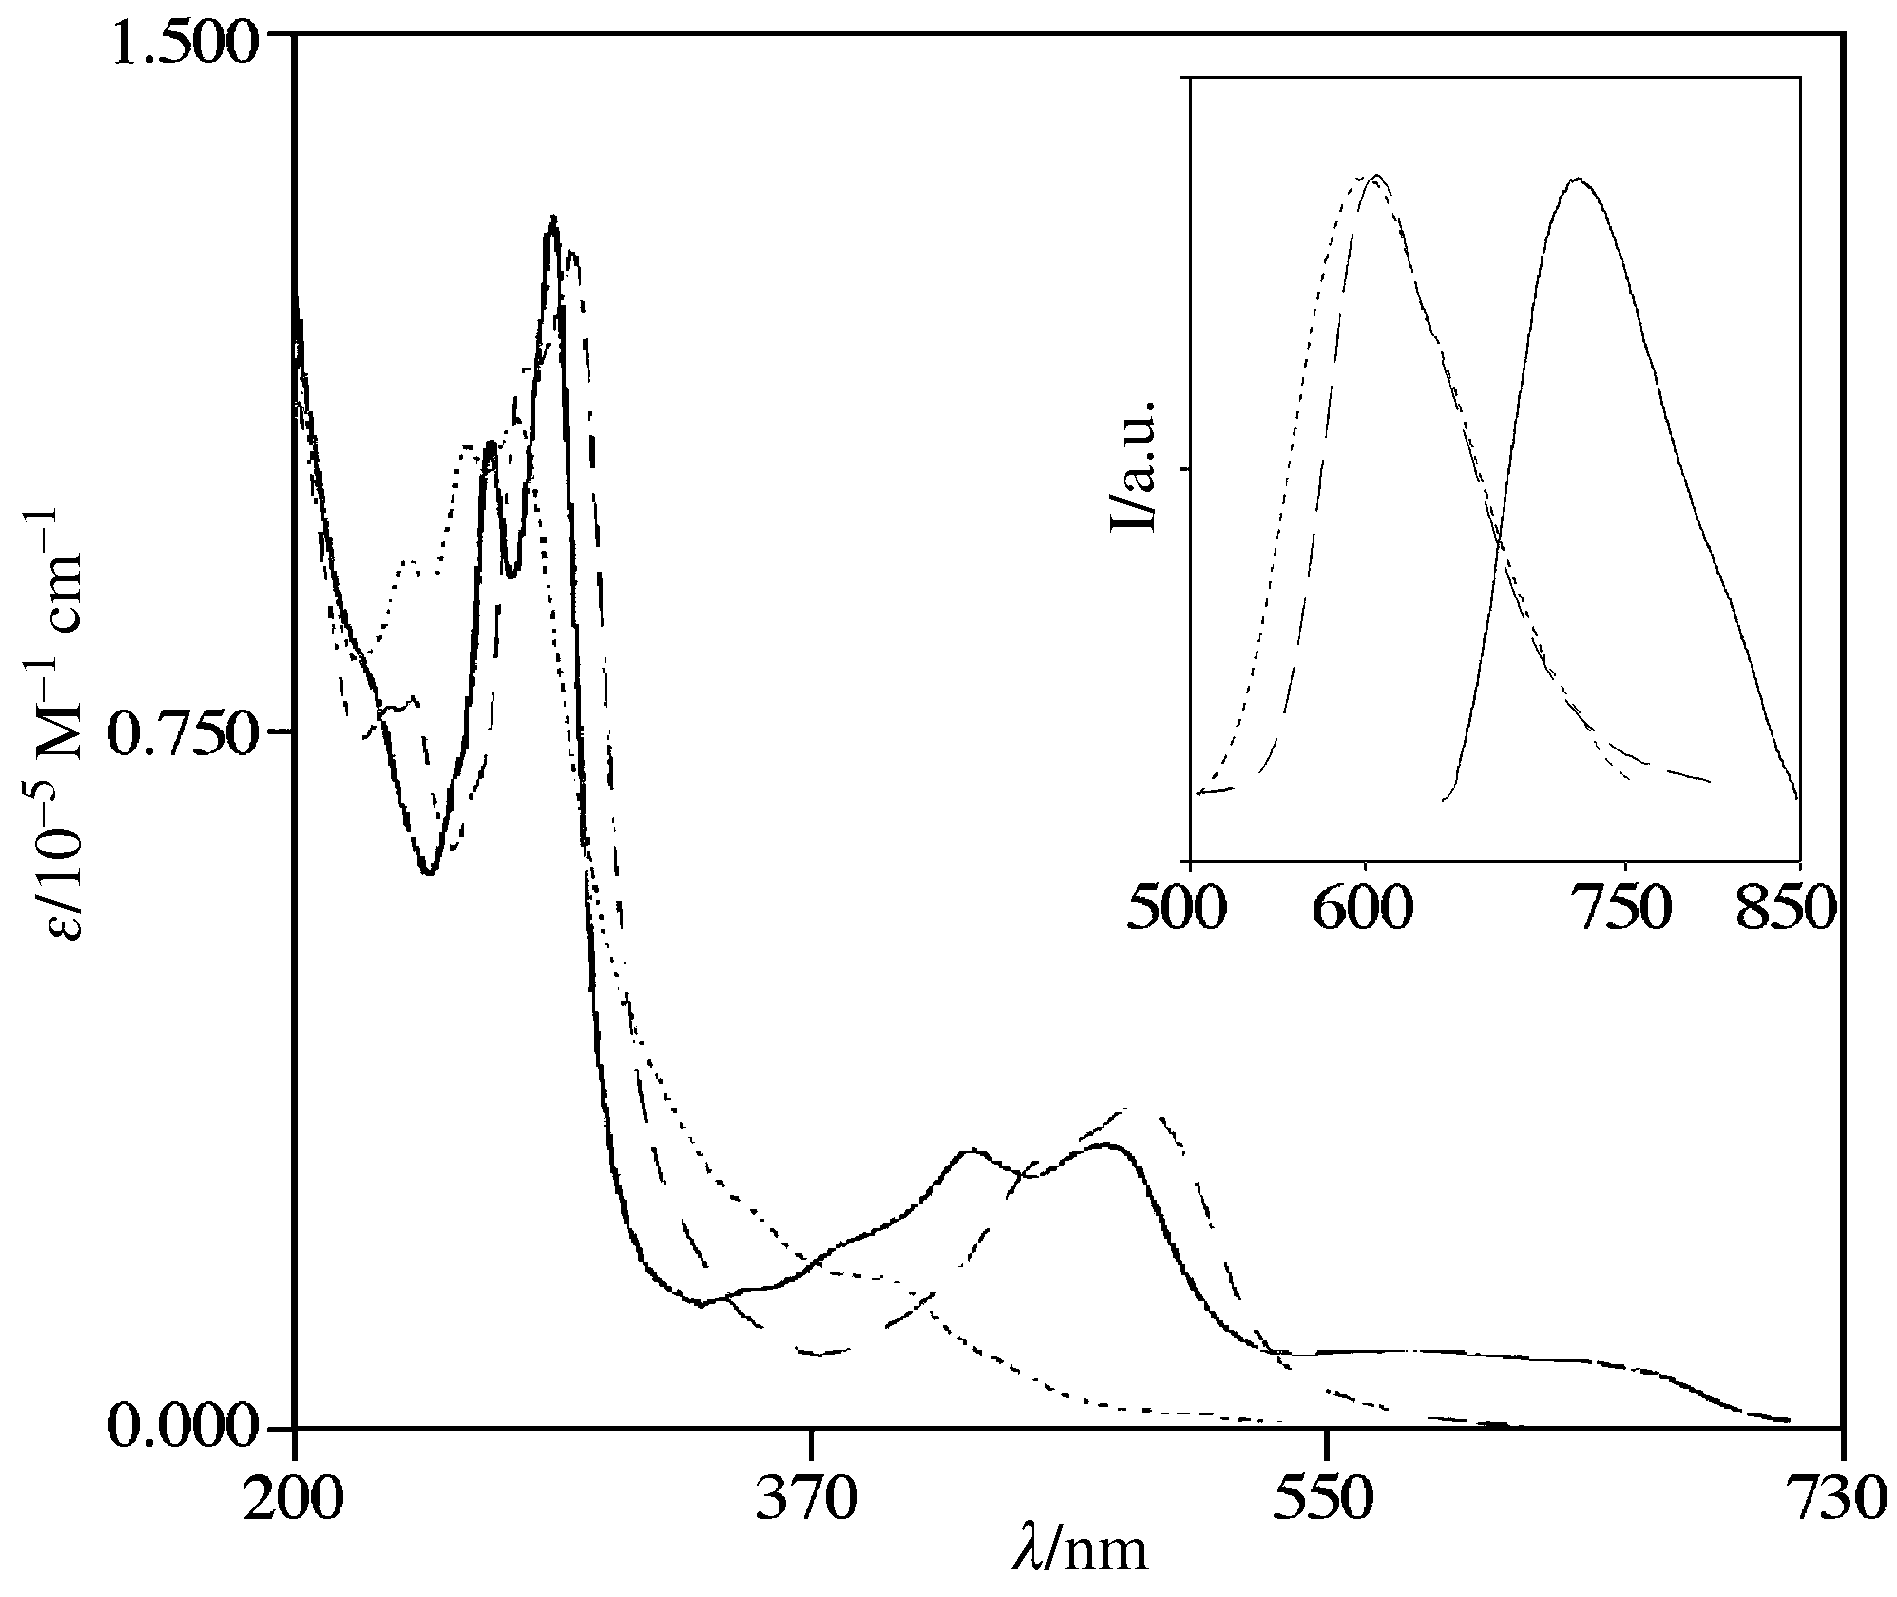


**Figure 2.** Absorption spectra and (inset) emission spectra of **1** (dotted line), **2** (dashed line), and **3** (solid line) in acetonitrile at room temperature. The emission spectra shown are uncorrected for photomultiplier response. Corrected maxima are shown in Table 2.
